# Supplementary material for: Systemic Therapy of Neuroendocrine Neoplasia: Single Center Experience from a Cohort of 110 Consecutive Cases
Source: Hindawi journal article supplement (doi:10.1155/2020/1491475), 2020-01-31
Supplement: f1 [file 1491475.f1.pdf]

## Supplemental Figure 1

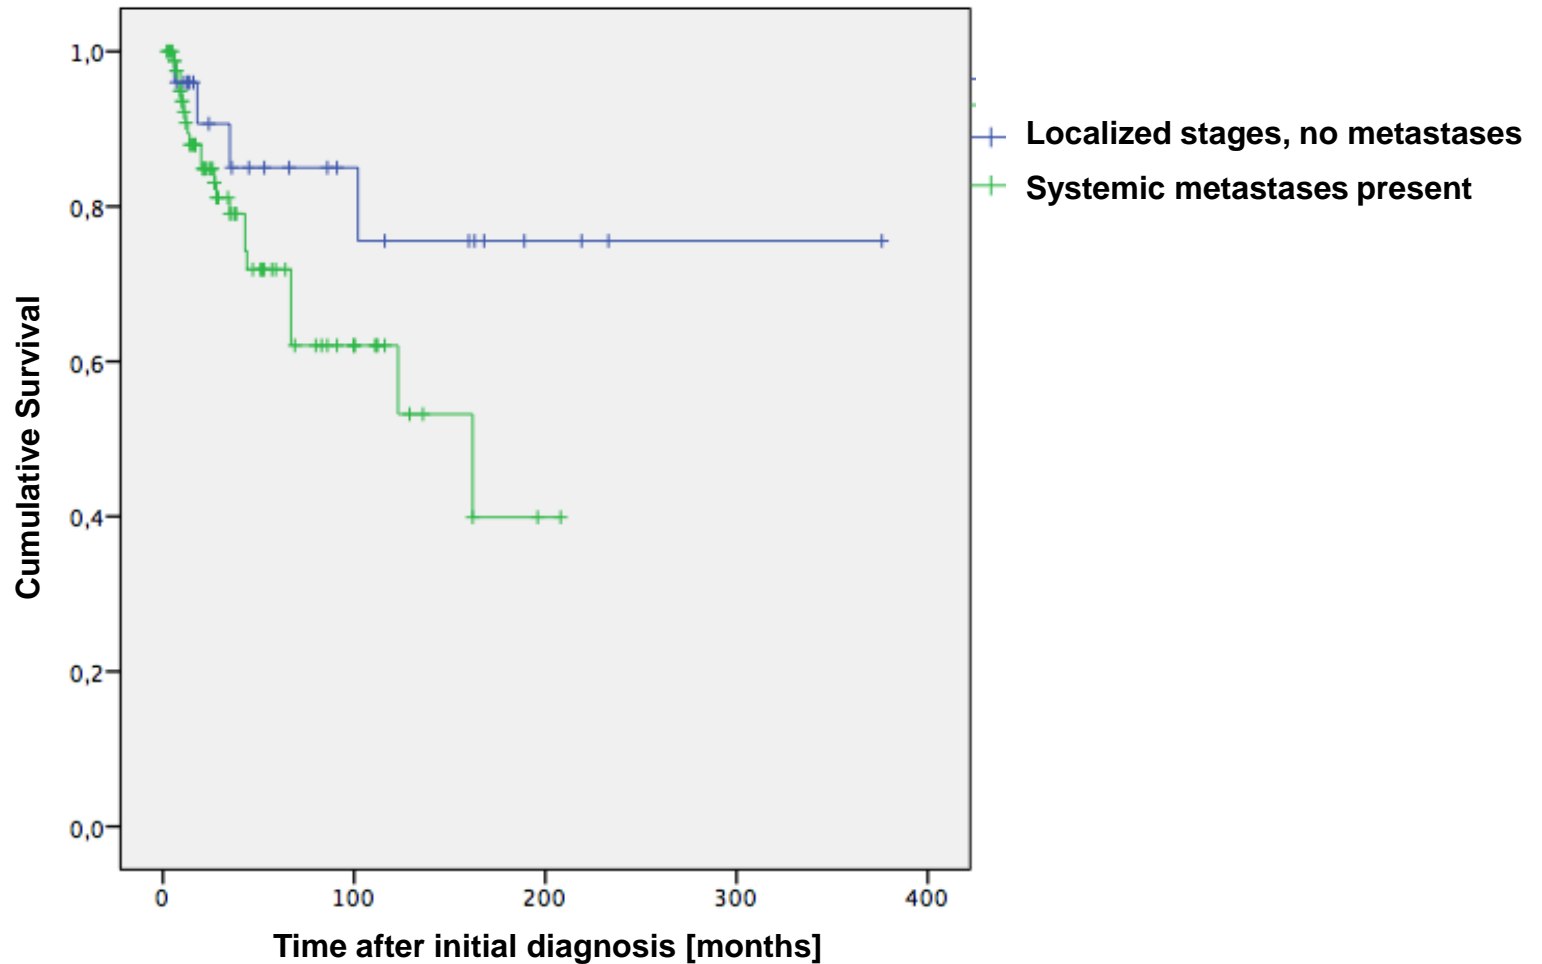

Legend to Supplemental Figure 1:

Presence of systemic metastases confers adverse prognosis in neuroendocrine neoplasia

(Kaplan-Meier analysis of overall survival).

**Supplemental Table 1:**

Patient survival vs. presence of systemic metastases

|                       | <b>Systemic metastases present</b><br>(n=85) | <b>No metastases</b><br>(n=25) |
|-----------------------|----------------------------------------------|--------------------------------|
| 1-year survival rate  | 85%                                          | 95%                            |
| 5-year survival rate  | 76%                                          | 72%                            |
| 10-year survival rate | 0%                                           | 40%                            |

**Supplemental Table 2:**

Frequency of chemotherapy administration versus proliferation index (n=92).

| Ki67 [%] | Chemotherapy applied |     |
|----------|----------------------|-----|
|          | n                    | (%) |
| <2       | 2/28                 | 7   |
| 3-5      | 3/16                 | 19  |
| 6-20     | 11/24                | 46  |
| 21-49    | 8/10                 | 80  |
| >50      | 14/14                | 100 |

**Supplemental Table 3:**

Therapeutic efficacy of platinum-based chemotherapy.

| Regimen               | Best response |    |    |    | PFS <sup>1</sup> |      |                 |
|-----------------------|---------------|----|----|----|------------------|------|-----------------|
|                       | CR            | PR | SD | PD | Median           | Mean | SD <sup>2</sup> |
| Carboplatin/ Etoposid | 0             | 8  | 5  | 5  | 5                | 7.3  | 16              |
| Cisplatin/ Etoposid   | 0             | 1  | 3  | 1  | 7                | 5.2  | 8.9             |

<sup>1</sup>PFS: Progression-free survival [months]

<sup>2</sup>SD: standard deviation

**Supplemental Table 4:**

Frequency of PRRT versus histological grading or proliferation index.

| <b>Parameter</b> | <b>Fraction treated with PRRT</b> |
|------------------|-----------------------------------|
| NET G1 / G2      | 55/75 (73%)                       |
| NEC G3           | 6/26 (23%)                        |
| Ki67<20%         | 50/68 (74%)                       |
| Ki67 21-50%      | 5/10 (50%)                        |
| Ki67 >50%        | 1/14 (7%)                         |

**Supplemental Table 5:**

Therapeutic response to PRRT versus histological grade.

| <b>Histological Grade</b> | <b>CR</b> | <b>PR</b>  | <b>SD</b>   | <b>PD</b>  | <b>MR</b> |
|---------------------------|-----------|------------|-------------|------------|-----------|
| G1                        | 0/19 (0%) | 6/19 (32%) | 11/19 (58%) | 2/19 (11%) | 0/19 (0%) |
| G2                        | 0/21      | 7/21 (33%) | 12/21 (57%) | 1/21 (5%)  | 1/21 (5%) |
| G3                        | 0/5 (0%)  | 2/5 (40%)  | 3/5 (60%)   | 0/5 (0%)   | 0/5 (0%)  |
